# Supplementary material for: Bayesian Phylogeographic Inference Suggests Japan as the Center for the Origin and Dissemination of Rice Stripe Virus
Source: MDPI journal article supplement (doi:10.3390/v14112547), 2022-11-17
Supplement: s1 [file s1]

**Table S1** Rice stripe virus isolates used in this study

| No. | Isolate    | Country | Region | Host                          | Collection date | ACCESSION |
|-----|------------|---------|--------|-------------------------------|-----------------|-----------|
| 1   | ABB07      | China   | CCD    | <i>Oryza sativa</i>           | 2007-7-1        | EU931524  |
| 2   | JS.FS.04   | China   | CCD    | <i>Oryza sativa</i>           | 2004            | AY973309  |
| 3   | AHF1.04    | China   | CCD    | <i>Oryza sativa</i>           | 2004-7-1        | DQ289589  |
| 4   | AHF2.04    | China   | CCD    | <i>Oryza sativa</i>           | 2004-7-1        | DQ289590  |
| 5   | AHF3.04    | China   | CCD    | <i>Oryza sativa</i>           | 2004-7-1        | DQ289591  |
| 6   | AHF1.05    | China   | CCD    | <i>Oryza sativa</i>           | 2005-7-1        | DQ299153  |
| 7   | AHF2.05    | China   | CCD    | <i>Oryza sativa</i>           | 2005-7-1        | DQ299154  |
| 8   | HZ         | China   | CCD    | <i>Oryza sativa</i>           | 2001            | AF508865  |
| 9   | HZ         | China   | CCD    | <i>Oryza sativa</i>           | 2001            | AY286108  |
| 10  | JS.HZ.03   | China   | CCD    | <i>Oryza sativa</i>           | 2003-7-1        | AY597379  |
| 11  | LS.JSHZ03  | China   | CCD    | <i>Oryza sativa</i>           | 2003-9-3        | EF198685  |
| 12  | HA         | China   | CCD    | <i>Oryza sativa</i>           | 2001            | AY286109  |
| 13  | JD         | China   | CCD    | <i>Oryza sativa</i>           | 1997            | AF220104  |
| 14  | IOZ        | China   | CCD    | <i>Oryza sativa</i>           | 2016-6-20       | MF287953  |
| 15  | JS.YH.04   | China   | CCD    | <i>Oryza sativa</i>           | 2004            | AY973308  |
| 16  | JS.YM      | China   | CCD    | <i>Triticum aestivum</i>      | 2006-8-31       | AM397834  |
| 17  | JSu1       | China   | CCD    | <i>Oryza sativa</i>           | 2013-4-3        | KP083238  |
| 18  | CN.JSCX08  | China   | CCD    | <i>Laodelphax striatellus</i> | 2008-10-1       | AB622862  |
| 19  | CN.JSYX08  | China   | CCD    | <i>Laodelphax striatellus</i> | 2008-10-1       | AB622863  |
| 20  | DZ         | China   | CCD    | <i>Oryza sativa</i>           | 2001            | AY284864  |
| 21  | JY         | China   | CCD    | <i>Oryza sativa</i>           | 2006            | EF141329  |
| 22  | JS.JH.04   | China   | CCD    | <i>Oryza sativa</i>           | 2004            | AY973310  |
| 23  | LS.JSJJ03  | China   | CCD    | <i>Oryza sativa</i>           | 2003-7-26       | EF198682  |
| 24  | LS.JSJJ054 | China   | CCD    | <i>Oryza sativa</i>           | 2005-9-30       | EF198681  |
| 25  | LS.JSJJ051 | China   | CCD    | <i>Oryza sativa</i>           | 2005-9-30       | EF198691  |
| 26  | LS.JSJJ052 | China   | CCD    | <i>Oryza sativa</i>           | 2005-9-30       | EF198693  |
| 27  | LS.JSPX03  | China   | CCD    | <i>Oryza sativa</i>           | 2003-6-14       | EF198699  |
| 28  | JiangY10   | China   | CCD    | <i>Oryza sativa</i>           | 2010-7-25       | JQ927422  |
| 29  | SuZ10      | China   | CCD    | <i>Oryza sativa</i>           | 2010-7-25       | JQ927425  |
| 30  | JYC07      | China   | CCD    | <i>Oryza sativa</i>           | 2007-7-1        | EU931516  |
| 31  | LS.JSYD03  | China   | CCD    | <i>Oryza sativa</i>           | 2003-7-21       | EF198688  |
| 32  | LS.JSYD051 | China   | CCD    | <i>Oryza sativa</i>           | 2005-10-5       | EF198689  |
| 33  | LS.JSYD052 | China   | CCD    | <i>Oryza sativa</i>           | 2005-10-5       | EF198692  |
| 34  | Zhejiang   | China   | CCD    | <i>Oryza sativa</i>           | 2003-7-1        | DQ333944  |
| 35  | HuZ10      | China   | CCD    | <i>Oryza sativa</i>           | 2010-7-25       | JQ927421  |
| 36  | CN.ZAHZ08  | China   | CCD    | <i>Laodelphax striatellus</i> | 2008-9-1        | AB622861  |
| 37  | JP.FKYM08  | Japan   | JAP    | <i>Laodelphax striatellus</i> | 2008-6-1        | AB622859  |
| 38  | JP.KGMS08  | Japan   | JAP    | <i>Laodelphax striatellus</i> | 2008-6-1        | AB622856  |
| 39  | JP.KMAK08  | Japan   | JAP    | <i>Laodelphax striatellus</i> | 2008-6-1        | AB622857  |
| 40  | JP.KMKS08  | Japan   | JAP    | <i>Laodelphax striatellus</i> | 2008-5-1        | AB622858  |
| 41  | JP.NSTG08  | Japan   | JAP    | <i>Laodelphax striatellus</i> | 2008-8-1        | AB622860  |

|    |             |             |     |                               |           |          |
|----|-------------|-------------|-----|-------------------------------|-----------|----------|
| 42 | JP.R.NSTG08 | Japan       | JAP | <i>Oryza sativa</i>           | 2008-8-1  | AB622864 |
| 43 | JP.R.NSHO08 | Japan       | JAP | <i>Oryza sativa</i>           | 2008-8-1  | AB622865 |
| 44 | Japan.M     | Japan       | JAP | <i>Oryza sativa</i>           | 1986      | D01094   |
| 45 | JP.TGOY09   | Japan       | JAP | <i>Laodelphax striatellus</i> | 2009-10-1 | AB622866 |
| 46 | isolate T   | Japan       | JAP | <i>Triticum aestivum</i>      | 1989      | X53563   |
| 47 | AD.JJ       | South Korea | KOR | <i>Oryza sativa</i>           | 2007      | FJ602684 |
| 48 | BA1.JB      | South Korea | KOR | <i>Oryza sativa</i>           | 2007      | FJ602675 |
| 49 | BA2.JB      | South Korea | KOR | <i>Oryza sativa</i>           | 2007      | FJ602676 |
| 50 | Cheon'an    | South Korea | KOR | <i>Oryza sativa</i>           | 2013-7-1  | KF885681 |
| 51 | Cheongwon   | South Korea | KOR | <i>Oryza sativa</i>           | 2013-7-1  | KF885683 |
| 52 | Cheorwon2   | South Korea | KOR | <i>Oryza sativa</i>           | 2013-7-1  | KF885685 |
| 53 | CY.CN       | South Korea | KOR | <i>Oryza sativa</i>           | 2007      | FJ602682 |
| 54 | SC.CN6      | South Korea | KOR | <i>Oryza sativa</i>           | 2009      | HQ343292 |
| 55 | SC.CN70     | South Korea | KOR | <i>Oryza sativa</i>           | 2009      | HQ343293 |
| 56 | TA.CN5      | South Korea | KOR | <i>Oryza sativa</i>           | 2009      | HQ343294 |
| 57 | Dangjin     | South Korea | KOR | <i>Oryza sativa</i>           | 2013-7-1  | KF885687 |
| 58 | Gangneung   | South Korea | KOR | <i>Oryza sativa</i>           | 2013-7-1  | KF885689 |
| 59 | Goseong.a2  | South Korea | KOR | <i>Oryza sativa</i>           | 2013-7-1  | KF885697 |
| 60 | Geochang    | South Korea | KOR | <i>Oryza sativa</i>           | 2013-7-1  | KF885691 |
| 61 | Gimcheon    | South Korea | KOR | <i>Oryza sativa</i>           | 2013-7-1  | KF885693 |
| 62 | Gimje       | South Korea | KOR | <i>Oryza sativa</i>           | 2013-7-1  | KF885695 |
| 63 | GC.JB       | South Korea | KOR | <i>Oryza sativa</i>           | 2007      | FJ602679 |
| 64 | GS.JB       | South Korea | KOR | <i>Oryza sativa</i>           | 2007      | FJ602677 |
| 65 | Goseong.b   | South Korea | KOR | <i>Oryza sativa</i>           | 2013-7-1  | KF885699 |
| 66 | Haenam      | South Korea | KOR | <i>Oryza sativa</i>           | 2013-7-1  | KF885701 |
| 67 | Hwaseong    | South Korea | KOR | <i>Oryza sativa</i>           | 2013-7-1  | KF885703 |
| 68 | IS.JB       | South Korea | KOR | <i>Oryza sativa</i>           | 2007      | FJ602678 |
| 69 | Jecheon     | South Korea | KOR | <i>Oryza sativa</i>           | 2013-7-1  | KF885705 |
| 70 | Jeju        | South Korea | KOR | <i>Oryza sativa</i>           | 2013-7-1  | KF885707 |
| 71 | BA.JB6      | South Korea | KOR | <i>Oryza sativa</i>           | 2009      | HQ343287 |
| 72 | BA.JB16     | South Korea | KOR | <i>Oryza sativa</i>           | 2009      | HQ343288 |
| 73 | GS.JB16     | South Korea | KOR | <i>Oryza sativa</i>           | 2009      | HQ343289 |
| 74 | JD.JN4      | South Korea | KOR | <i>Oryza sativa</i>           | 2009      | HQ343290 |
| 75 | JD.JN6      | South Korea | KOR | <i>Oryza sativa</i>           | 2009      | HQ343291 |
| 76 | Jincheon    | South Korea | KOR | <i>Oryza sativa</i>           | 2013-7-1  | KF885709 |
| 77 | JD.JN       | South Korea | KOR | <i>Oryza sativa</i>           | 2007      | FJ602681 |
| 78 | Miryang     | South Korea | KOR | <i>Oryza sativa</i>           | 2013-7-1  | KF885711 |
| 79 | MA.JN       | South Korea | KOR | <i>Oryza sativa</i>           | 2007      | FJ602680 |
| 80 | Naju        | South Korea | KOR | <i>Oryza sativa</i>           | 2013-7-1  | KF885713 |
| 81 | Pyeongtaek  | South Korea | KOR | <i>Oryza sativa</i>           | 2013-7-1  | KF885715 |
| 82 | Sacheon2    | South Korea | KOR | <i>Oryza sativa</i>           | 2013-7-1  | KF885717 |
| 83 | Sangju      | South Korea | KOR | <i>Oryza sativa</i>           | 2013-7-1  | KF885719 |
| 84 | SC.CN       | South Korea | KOR | <i>Oryza sativa</i>           | 2007      | FJ602683 |
| 85 | Seosan      | South Korea | KOR | <i>Oryza sativa</i>           | 2013-7-1  | KF885721 |

|     |            |             |     |                     |           |          |
|-----|------------|-------------|-----|---------------------|-----------|----------|
| 86  | SA.JN      | South Korea | KOR | <i>Oryza sativa</i> | 2008      | FJ602685 |
| 87  | Suwon      | South Korea | KOR | <i>Oryza sativa</i> | 2006-5-1  | GU230170 |
| 88  | Uiseong    | South Korea | KOR | <i>Oryza sativa</i> | 2013-7-1  | KF885723 |
| 89  | WD.JN      | South Korea | KOR | <i>Oryza sativa</i> | 2008      | FJ602686 |
| 90  | YG.JN      | South Korea | KOR | <i>Oryza sativa</i> | 2008      | FJ602687 |
| 91  | BJ1        | China       | NCS | <i>Oryza sativa</i> | 2001      | AY284873 |
| 92  | BCP2.04    | China       | NCS | <i>Oryza sativa</i> | 2004-7-1  | DQ299151 |
| 93  | BCP1.04    | China       | NCS | <i>Oryza sativa</i> | 2004-7-1  | DQ299152 |
| 94  | BCP4.04    | China       | NCS | <i>Oryza sativa</i> | 2004-7-1  | DQ302798 |
| 95  | ND.2002    | China       | NCS | <i>Oryza sativa</i> | 2002-7-1  | AY289045 |
| 96  | HN.ND.04   | China       | NCS | <i>Oryza sativa</i> | 2004      | AY973311 |
| 97  | JN1        | China       | NCS | <i>Oryza sativa</i> | 2001      | AY284872 |
| 98  | SD.JN2     | China       | NCS | <i>Oryza sativa</i> | 2005      | DQ108406 |
| 99  | SJN1.05    | China       | NCS | <i>Oryza sativa</i> | 2005-8-1  | DQ299155 |
| 100 | SJN2.05    | China       | NCS | <i>Oryza sativa</i> | 2005-8-1  | DQ299156 |
| 101 | SJN1.04    | China       | NCS | <i>Oryza sativa</i> | 2004-8-1  | DQ299167 |
| 102 | SJN2.04    | China       | NCS | <i>Oryza sativa</i> | 2004-8-1  | DQ299168 |
| 103 | SJN3.04    | China       | NCS | <i>Oryza sativa</i> | 2004-8-1  | DQ299169 |
| 104 | SJN4.04    | China       | NCS | <i>Oryza sativa</i> | 2004-8-1  | DQ299170 |
| 105 | LS.SDJN051 | China       | NCS | <i>Oryza sativa</i> | 2005-4-30 | EF198690 |
| 106 | JN         | China       | NCS | <i>Oryza sativa</i> | 1997      | AF220105 |
| 107 | LS.SDJN052 | China       | NCS | <i>Oryza sativa</i> | 2005-4-30 | EF198680 |
| 108 | SJN07      | China       | NCS | <i>Oryza sativa</i> | 2007-7-1  | EU931512 |
| 109 | HKF07      | China       | NCS | <i>Oryza sativa</i> | 2007-7-1  | EU931520 |
| 110 | SQ         | China       | NCS | <i>Oryza sativa</i> | 1997      | AF220108 |
| 111 | LS.HBTH05  | China       | NCS | <i>Oryza sativa</i> | 2005-7-29 | EF493227 |
| 112 | HN.TH.03   | China       | NCS | <i>Oryza sativa</i> | 2003-7-1  | AY597383 |
| 113 | BWQ1.05    | China       | NCS | <i>Oryza sativa</i> | 2005-7-1  | DQ299158 |
| 114 | TXQ1.04    | China       | NCS | <i>Oryza sativa</i> | 2004-7-1  | DQ299171 |
| 115 | TXQ2.04    | China       | NCS | <i>Oryza sativa</i> | 2004-7-1  | DQ299172 |
| 116 | TXQ3.04    | China       | NCS | <i>Oryza sativa</i> | 2004-7-1  | DQ299173 |
| 117 | TXQ4.04    | China       | NCS | <i>Oryza sativa</i> | 2004-7-1  | DQ299174 |
| 118 | HXH3.05    | China       | NCS | <i>Oryza sativa</i> | 2005-8-1  | DQ299157 |
| 119 | HXH1.05    | China       | NCS | <i>Oryza sativa</i> | 2005-8-1  | DQ299159 |
| 120 | HXH2.05    | China       | NCS | <i>Oryza sativa</i> | 2005-8-1  | DQ299160 |
| 121 | YY         | China       | NCS | <i>Oryza sativa</i> | 2001      | AY284859 |
| 122 | YY.2002    | China       | NCS | <i>Oryza sativa</i> | 2002-7-1  | AY289050 |
| 123 | HN.YY.03   | China       | NCS | <i>Oryza sativa</i> | 2003-7-1  | AY597386 |
| 124 | HN.YY.04   | China       | NCS | <i>Oryza sativa</i> | 2004      | AY973312 |
| 125 | HYY3.04    | China       | NCS | <i>Oryza sativa</i> | 2004-8-1  | DQ299164 |
| 126 | HYY1.04    | China       | NCS | <i>Oryza sativa</i> | 2004-8-1  | DQ302795 |
| 127 | HYY2.04    | China       | NCS | <i>Oryza sativa</i> | 2004-8-1  | DQ302796 |
| 128 | HZD1.05    | China       | NCS | <i>Oryza sativa</i> | 2005-8-1  | DQ299161 |
| 129 | HZD2.05    | China       | NCS | <i>Oryza sativa</i> | 2005-8-1  | DQ299162 |

|     |             |       |     |                     |                 |          |
|-----|-------------|-------|-----|---------------------|-----------------|----------|
| 130 | HZD3.05     | China | NCS | <i>Oryza sativa</i> | 2005-8-1        | DQ299163 |
| 131 | HZD1.04     | China | NCS | <i>Oryza sativa</i> | 2004-8-1        | DQ299165 |
| 132 | HZD2.04     | China | NCS | <i>Oryza sativa</i> | 2004-8-1        | DQ302797 |
| 133 | HZZ1.04     | China | NCS | <i>Oryza sativa</i> | 2004-8-1        | DQ299166 |
| 134 | HN.ZM.03    | China | NCS | <i>Oryza sativa</i> | 2003-7-1        | AY597387 |
| 135 | HN.ZM.04    | China | NCS | <i>Oryza sativa</i> | 2004            | AY973313 |
| 136 | BS          | China | SWM | <i>Oryza sativa</i> | 1997            | AF220103 |
| 137 | BS1         | China | SWM | <i>Oryza sativa</i> | 2000            | AY284874 |
| 138 | BS2         | China | SWM | <i>Oryza sativa</i> | 2001            | AY286099 |
| 139 | BS.2002     | China | SWM | <i>Oryza sativa</i> | 2002-7-1        | AY289039 |
| 140 | YN.BS.03    | China | SWM | <i>Oryza sativa</i> | 2003-7-1        | AY597375 |
| 141 | LS.YNBS041  | China | SWM | <i>Oryza sativa</i> | 2004-7-16       | EF198687 |
| 142 | LS.YNBS042  | China | SWM | <i>Oryza sativa</i> | 2004-7-16       | EF198698 |
| 143 | YBS07       | China | SWM | <i>Oryza sativa</i> | 2007-7-1        | EU931500 |
| 144 | CX1         | China | SWM | <i>Oryza sativa</i> | 2001            | AY284869 |
| 145 | CX2         | China | SWM | <i>Oryza sativa</i> | 2001            | AY284870 |
| 146 | CX3         | China | SWM | <i>Oryza sativa</i> | 2001            | AY284871 |
| 147 | CX.2002     | China | SWM | <i>Oryza sativa</i> | 2002            | AY289040 |
| 148 | YN.CX.03    | China | SWM | <i>Oryza sativa</i> | 2003-7-1        | AY597376 |
| 149 | YN.CX.03E   | China | SWM | <i>Oryza sativa</i> | 2003-7-1        | AY597377 |
| 150 | YN.CX.03.M3 | China | SWM | <i>Oryza sativa</i> | 2003-7-1        | AY597388 |
| 151 | YN.CX.03.M4 | China | SWM | <i>Oryza sativa</i> | 2003-7-1        | AY597389 |
| 152 | YN.CX.03.M5 | China | SWM | <i>Oryza sativa</i> | 2003-7-1        | AY597390 |
| 153 | YN.CX.03.M9 | China | SWM | <i>Oryza sativa</i> | 2003-7-1        | AY597391 |
| 154 | YN.CX.02    | China | SWM | <i>Oryza sativa</i> | 2002-7-1        | AY597392 |
| 155 | YCX07       | China | SWM | <i>Oryza sativa</i> | 2007-7-1        | EU931496 |
| 156 | YCXi8       | China | SWM | <i>Oryza sativa</i> | 2013-7-3        | KP083239 |
| 157 | Chinese.Y   | China | SWM | <i>Oryza sativa</i> | 1995            | Y11095   |
| 158 | DL1         | China | SWM | <i>Oryza sativa</i> | 2000            | AY284865 |
| 159 | DL2         | China | SWM | <i>Oryza sativa</i> | 2001            | AY284866 |
| 160 | DL3         | China | SWM | <i>Oryza sativa</i> | 2001            | AY284867 |
| 161 | DL.2002     | China | SWM | <i>Oryza sativa</i> | 2002-7-1        | AY289041 |
| 162 | YN.DL.03    | China | SWM | <i>Oryza sativa</i> | 2003-7-1        | AY597378 |
| 163 | LS.YNDL04   | China | SWM | <i>Oryza sativa</i> | 2004-7-16       | EF198683 |
| 164 | FM1         | China | SWM | <i>Oryza sativa</i> | 2001            | AY284861 |
| 165 | FM2         | China | SWM | <i>Oryza sativa</i> | 2001            | AY284862 |
| 166 | HT.2002     | China | SWM | <i>Oryza sativa</i> | 2002-7-1        | AY289042 |
| 167 | JC          | China | SWM | <i>Oryza sativa</i> | 2001            | AY284860 |
| 168 | XS.2002     | China | SWM | <i>Oryza sativa</i> | 2002-7-1        | AY289047 |
| 169 | KM          | China | SWM | <i>Oryza sativa</i> | 2001            | AF508912 |
| 170 | KM          | China | SWM | <i>Oryza sativa</i> | 2000 or<br>2001 | AY286106 |
| 171 | YLFc10      | China | SWM | <i>Oryza sativa</i> | 2013-7-3        | KP083234 |
| 172 | YN.LL.03    | China | SWM | <i>Oryza sativa</i> | 2003-7-1        | AY597380 |

|     |          |       |     |                     |           |          |
|-----|----------|-------|-----|---------------------|-----------|----------|
| 173 | LQ.2002  | China | SWM | <i>Oryza sativa</i> | 2002-7-1  | AY289043 |
| 174 | YN.LQ.03 | China | SWM | <i>Oryza sativa</i> | 2003-7-1  | AY597381 |
| 175 | YQJ07    | China | SWM | <i>Oryza sativa</i> | 2007-7-1  | EU931504 |
| 176 | YSDi28   | China | SWM | <i>Oryza sativa</i> | 2013-7-25 | KP083235 |
| 177 | YN.SL.03 | China | SWM | <i>Oryza sativa</i> | 2003-7-1  | AY597382 |
| 178 | Huid04   | China | SWM | <i>Oryza sativa</i> | 2004      | KX611339 |
| 179 | YSMi6    | China | SWM | <i>Oryza sativa</i> | 2013-7-30 | KP083236 |
| 180 | WS       | China | SWM | <i>Oryza sativa</i> | 2001      | AY286104 |
| 181 | WD       | China | SWM | <i>Oryza sativa</i> | 2001      | AY286103 |
| 182 | WD.2002  | China | SWM | <i>Oryza sativa</i> | 2002-7-1  | AY289046 |
| 183 | YN.WD.03 | China | SWM | <i>Oryza sativa</i> | 2003-7-1  | AY597384 |
| 184 | WD04     | China | SWM | <i>Oryza sativa</i> | 2004      | AY973551 |
| 185 | YYAn9    | China | SWM | <i>Oryza sativa</i> | 2013-7-3  | KP083237 |
| 186 | YL       | China | SWM | <i>Oryza sativa</i> | 1997      | AF220109 |
| 187 | YL       | China | SWM | <i>Oryza sativa</i> | 2001      | AF508913 |
| 188 | YL1      | China | SWM | <i>Oryza sativa</i> | 2001      | AY284868 |
| 189 | YL2      | China | SWM | <i>Oryza sativa</i> | 2001      | AY286100 |
| 190 | YR       | China | SWM | <i>Oryza sativa</i> | 2001      | AY286102 |
| 191 | YR.2002  | China | SWM | <i>Oryza sativa</i> | 2002-7-1  | AY289048 |
| 192 | DaL08    | China | SWM | <i>Oryza sativa</i> | 2008-7-1  | JQ927420 |
| 193 | KunM08   | China | SWM | <i>Oryza sativa</i> | 2008-7-1  | JQ927423 |
| 194 | BSh04    | China | SWM | <i>Oryza sativa</i> | 2004      | AJ875061 |
| 195 | DYa04    | China | SWM | <i>Oryza sativa</i> | 2004      | AJ875062 |
| 196 | YAn04    | China | SWM | <i>Oryza sativa</i> | 2004      | AJ875060 |
| 197 | FYi04    | China | SWM | <i>Oryza sativa</i> | 2004      | AJ875058 |
| 198 | FMi04    | China | SWM | <i>Oryza sativa</i> | 2004      | AJ875057 |
| 199 | LLi04    | China | SWM | <i>Oryza sativa</i> | 2004      | AJ875059 |
| 200 | BSh1     | China | SWM | <i>Oryza sativa</i> | 2003-8-1  | AJ781025 |
| 201 | CXi1     | China | SWM | <i>Oryza sativa</i> | 2003-8-1  | AJ781026 |
| 202 | SLi1     | China | SWM | <i>Oryza sativa</i> | 2003-8-1  | AJ781027 |
| 203 | YLi1     | China | SWM | <i>Oryza sativa</i> | 2003-8-1  | AJ781028 |
| 204 | YWS      | China | SWM | <i>Oryza sativa</i> | 2009      | FM242703 |
| 205 | YYL      | China | SWM | <i>Oryza sativa</i> | 2008      | FM242704 |
| 206 | YWD07    | China | SWM | <i>Oryza sativa</i> | 2007-7-1  | EU931508 |
| 207 | YX       | China | SWM | <i>Oryza sativa</i> | 2001      | AY286107 |
| 208 | YX.2002  | China | SWM | <i>Oryza sativa</i> | 2002-7-1  | AY289049 |
| 209 | YN.YX.03 | China | SWM | <i>Oryza sativa</i> | 2003-7-1  | AY597385 |
