# Supplementary material for: Bayesian Phylogeographic Inference Suggests Japan as the Center for the Origin and Dissemination of Rice Stripe Virus
Source: MDPI journal article supplement (doi:10.3390/v14112547), 2022-11-17
Supplement: s1 [file s1]

**Table S2** Marginal likelihoods of different combinations of clock model and tree prior

| <b>Molecular model</b>               | <b>Coalescent tree prior</b> | <b>Log marginal likelihood</b> |
|--------------------------------------|------------------------------|--------------------------------|
| Strict clock                         | Bayesian skyline             | -9989.138                      |
| Strict clock                         | Constant size                | -9990.471                      |
| <b>Strict clock</b>                  | <b>MASCOT</b>                | <b>-9434.610</b>               |
| Uncorrelated lognormal relaxed clock | Bayesian skyline             | -10443.327                     |
| Uncorrelated lognormal relaxed clock | Constant size                | -10560.719                     |
| Uncorrelated lognormal relaxed clock | MASCOT                       | -9711.672                      |

The best-fitting tree prior and molecular clock model are indicated in bold font.

MASCOT, the marginal approximation of the structured coalescent
