# Supplementary figures and images for: Bayesian Phylogeographic Inference Suggests Japan as the Center for the Origin and Dissemination of Rice Stripe Virus
Source: MDPI journal article supplement (doi:10.3390/v14112547), 2022-11-17

Figure S2

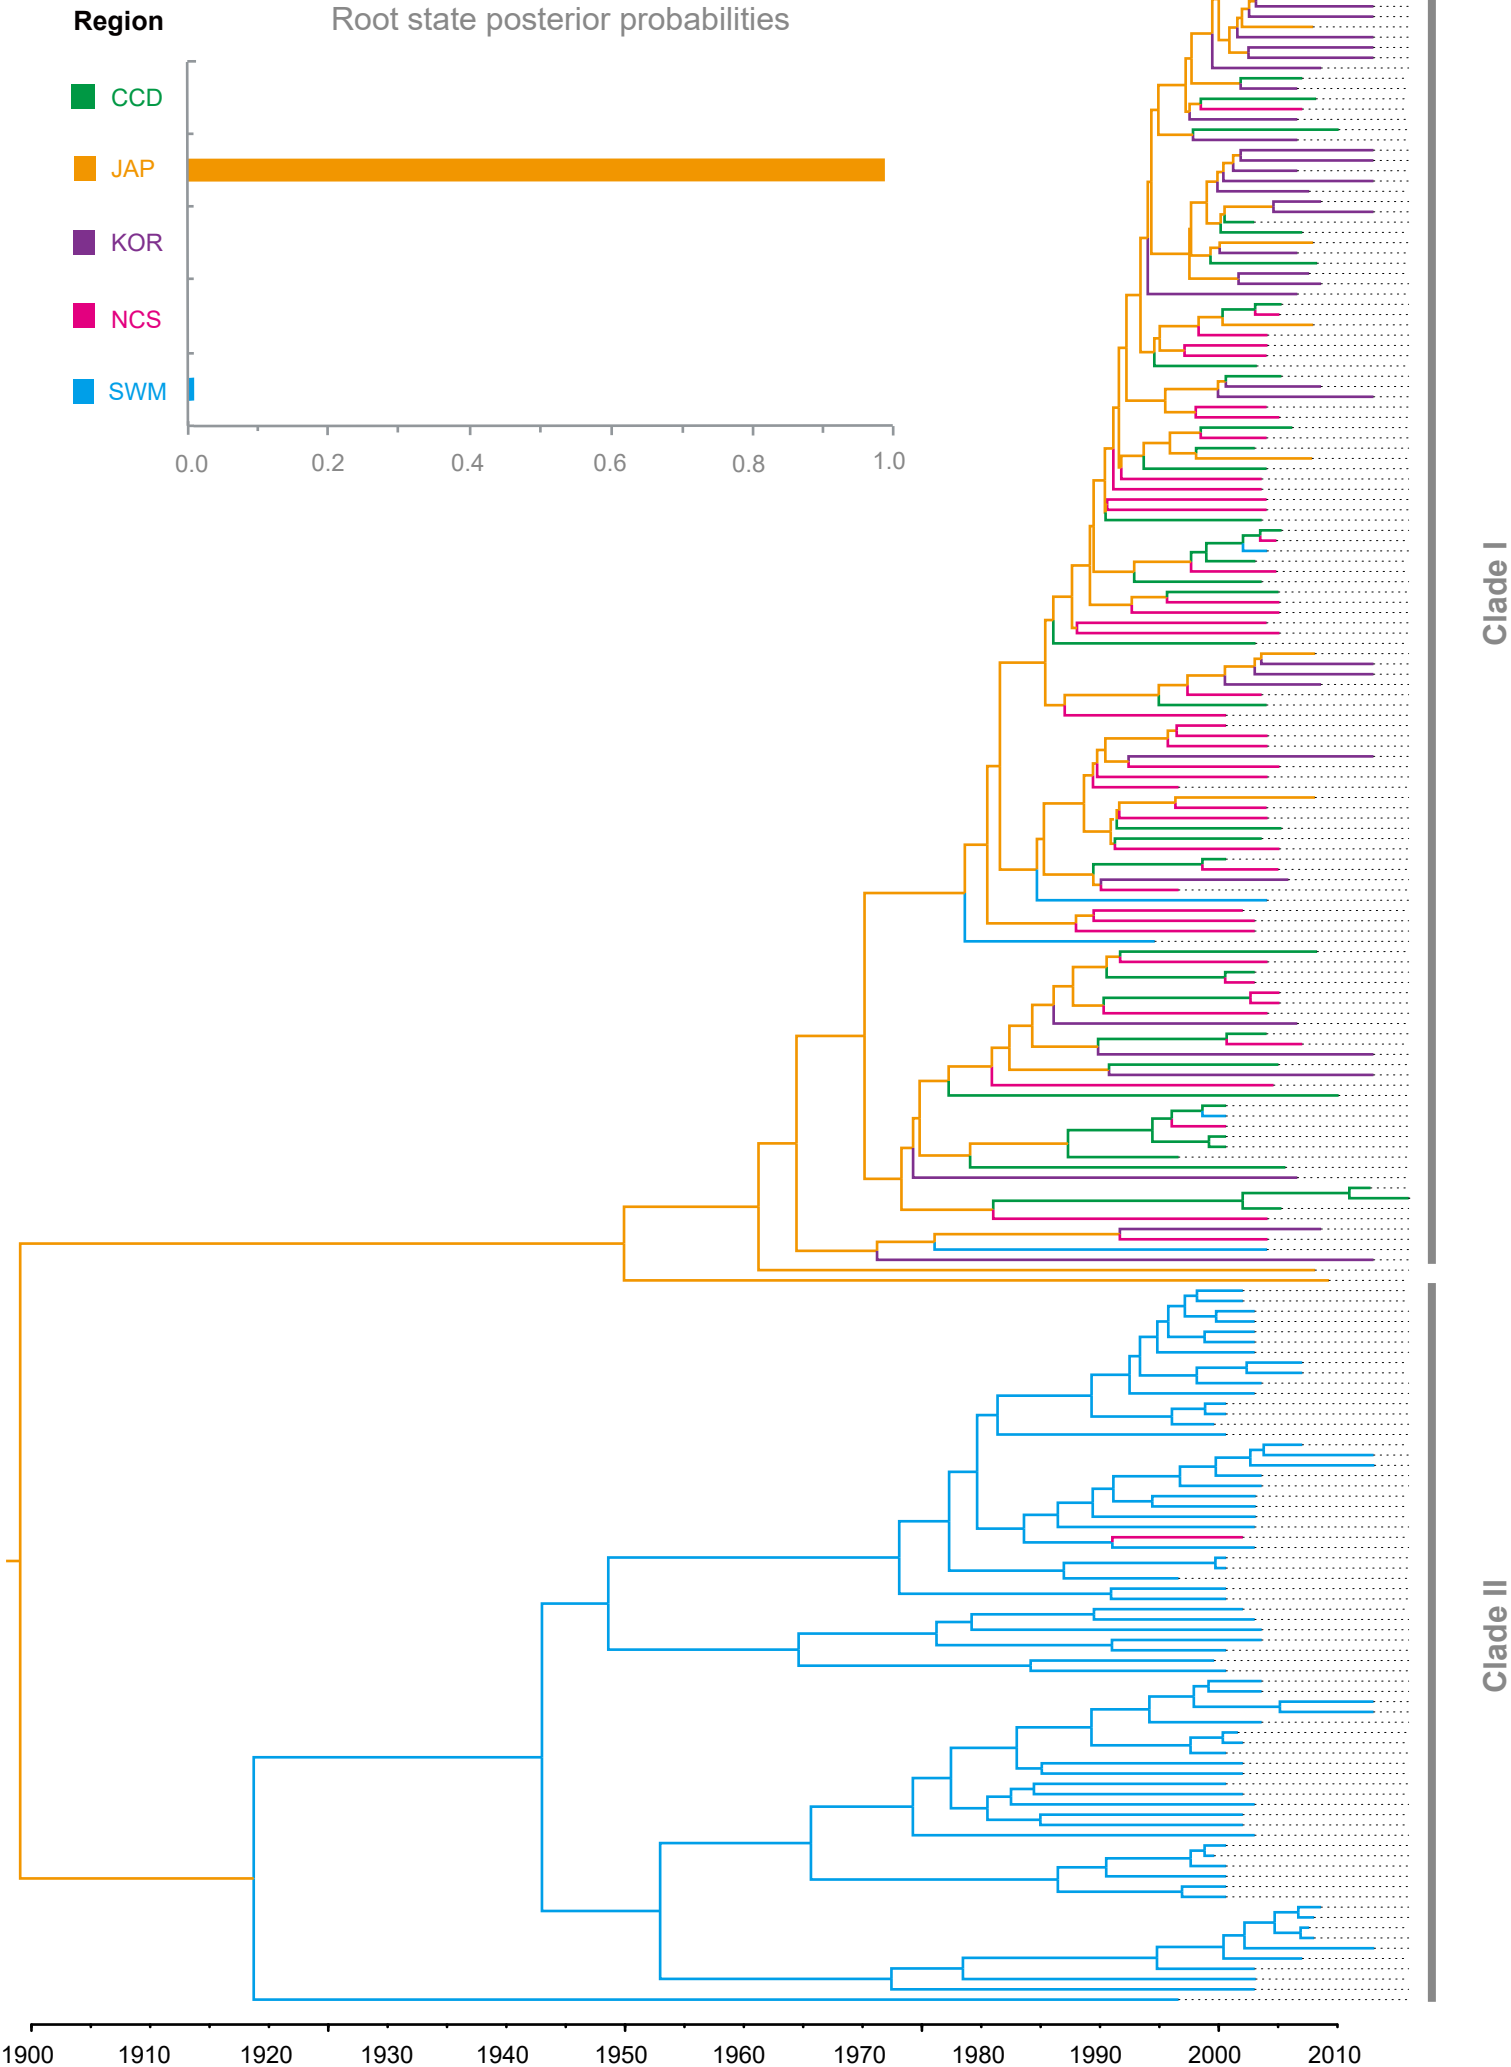

Supplement: s1 [file s1]

Figure S4

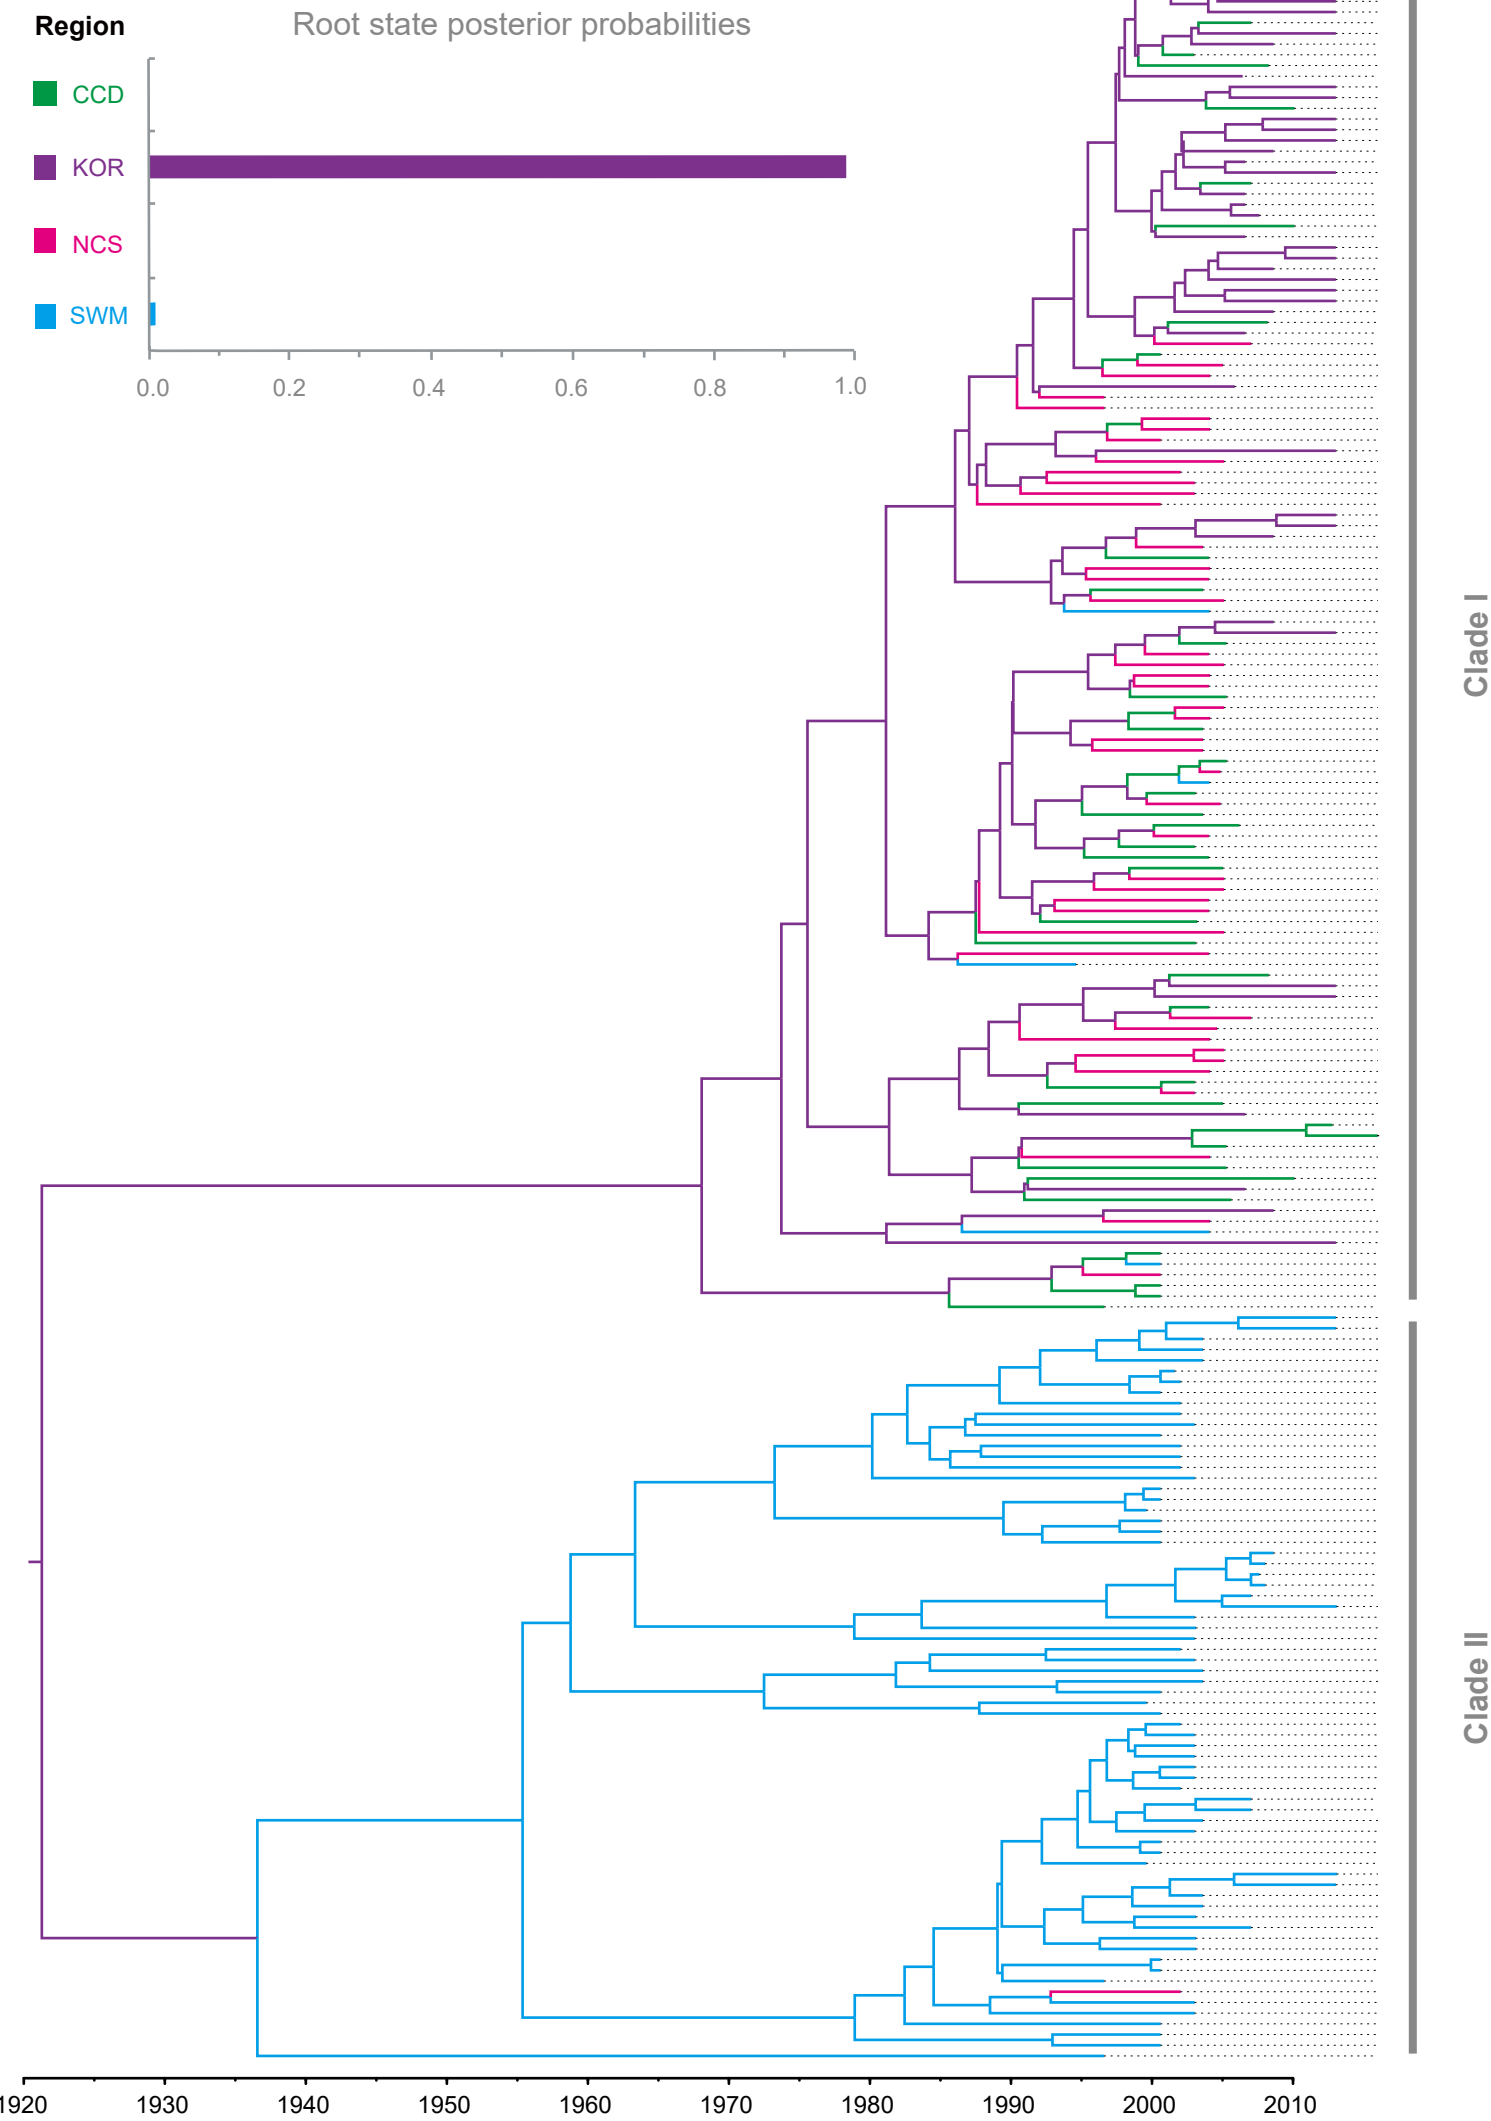

Supplement: s1 [file s1]

Figure S5

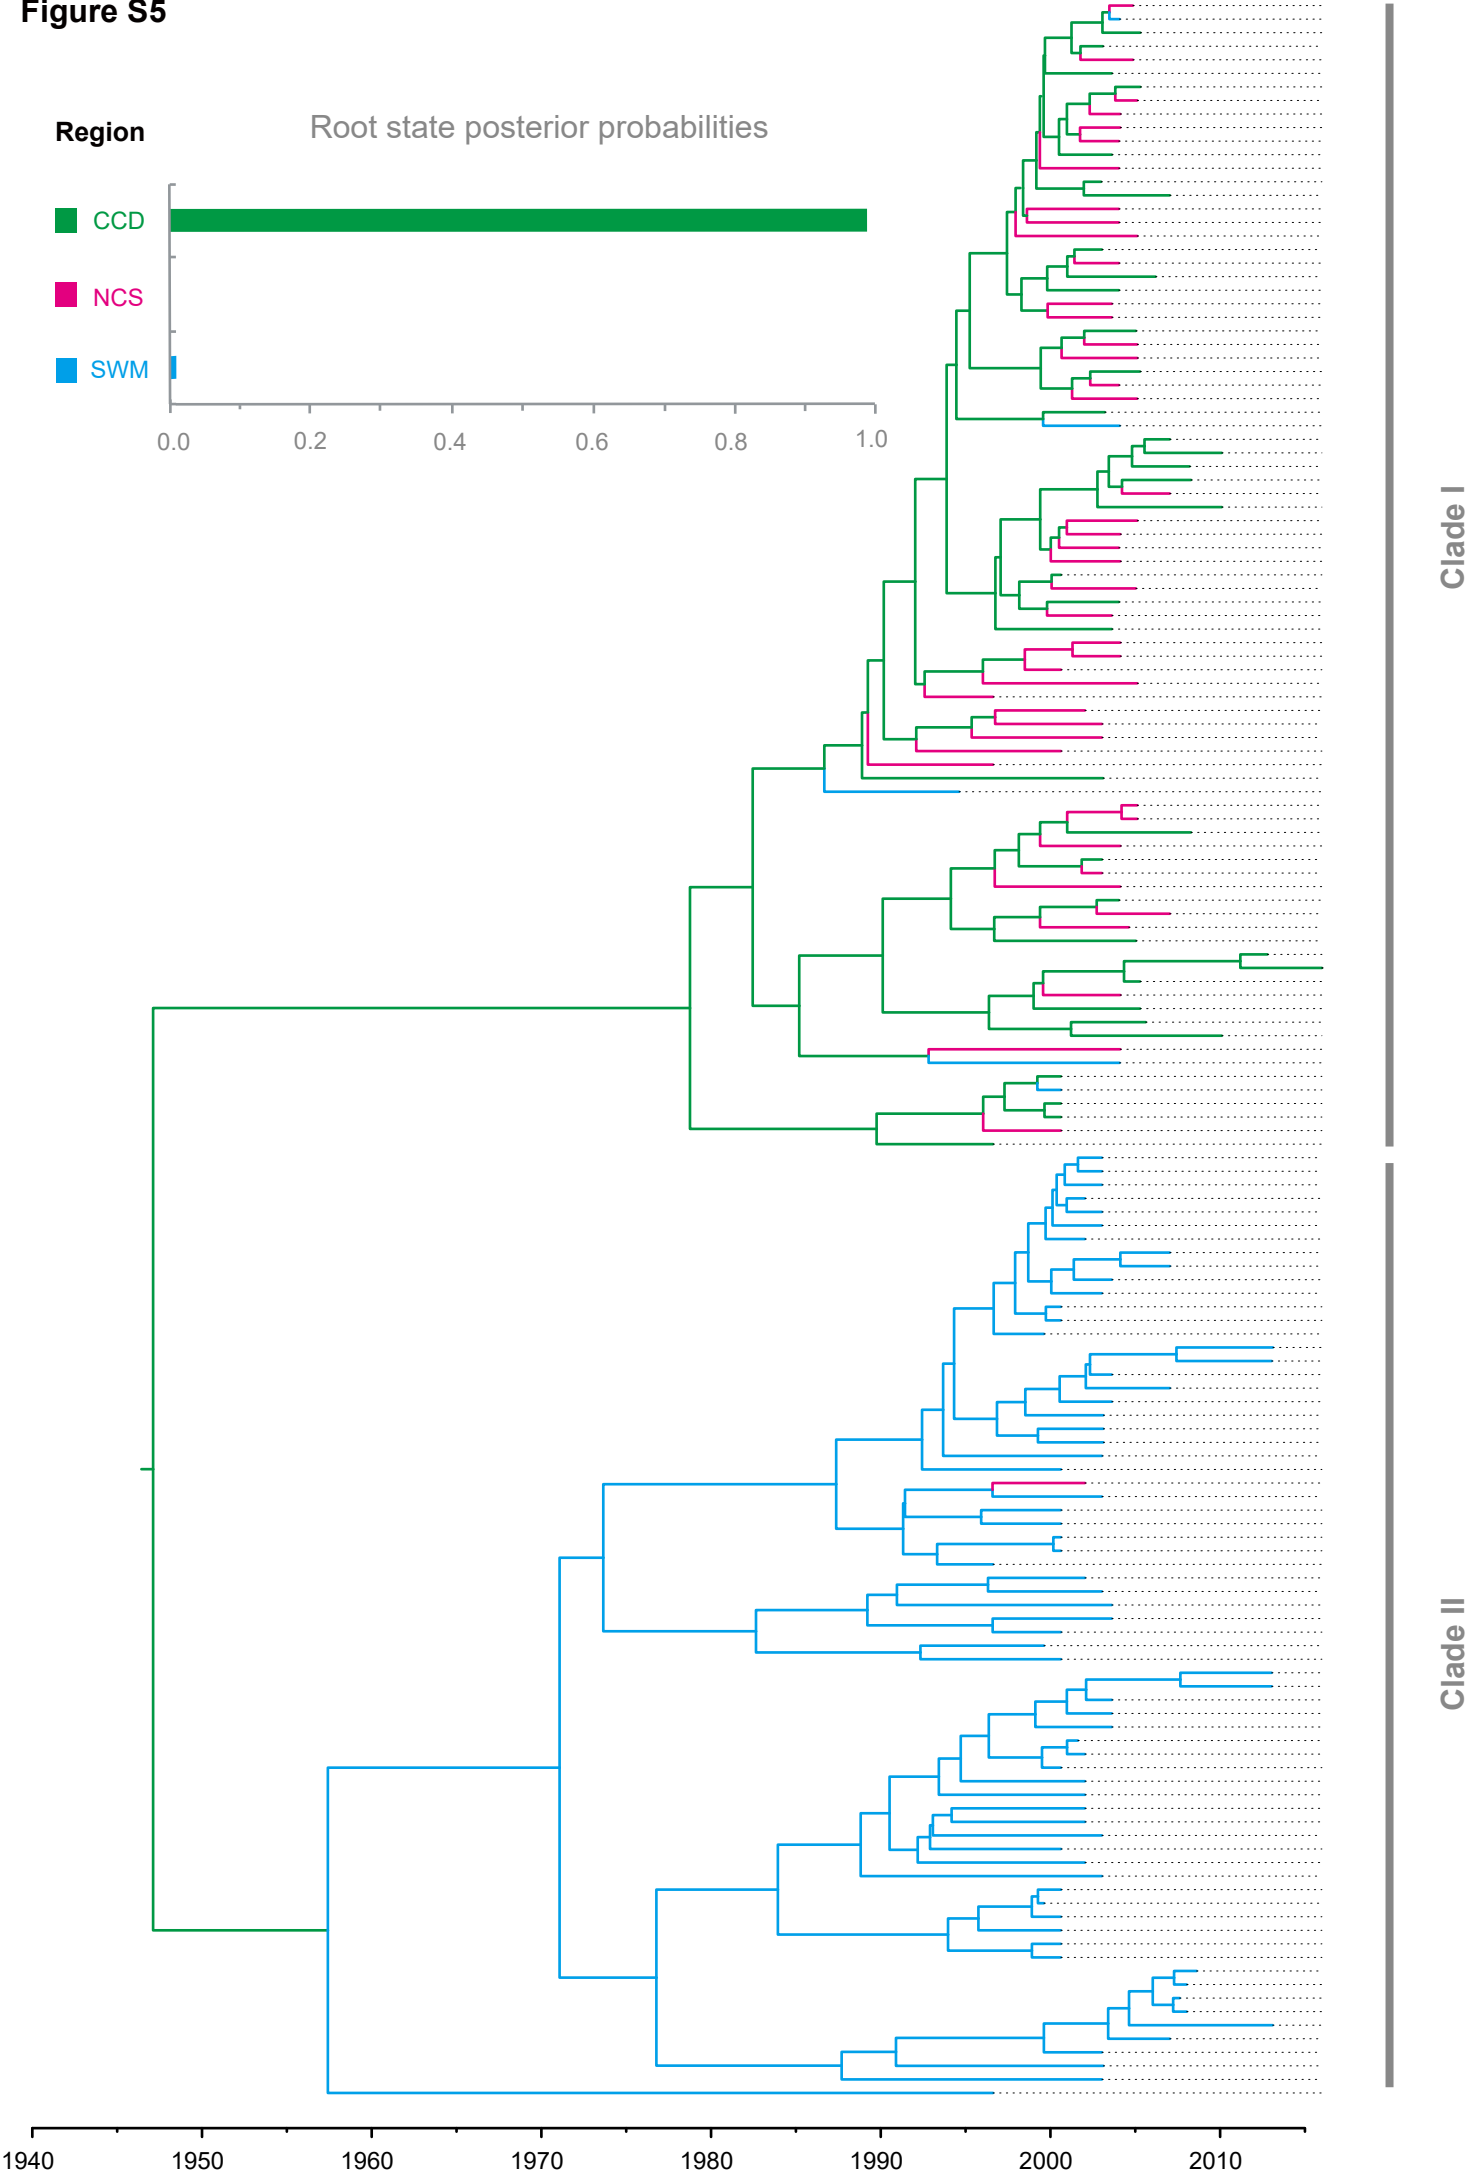

Supplement: s1 [file s1]

Figure S1

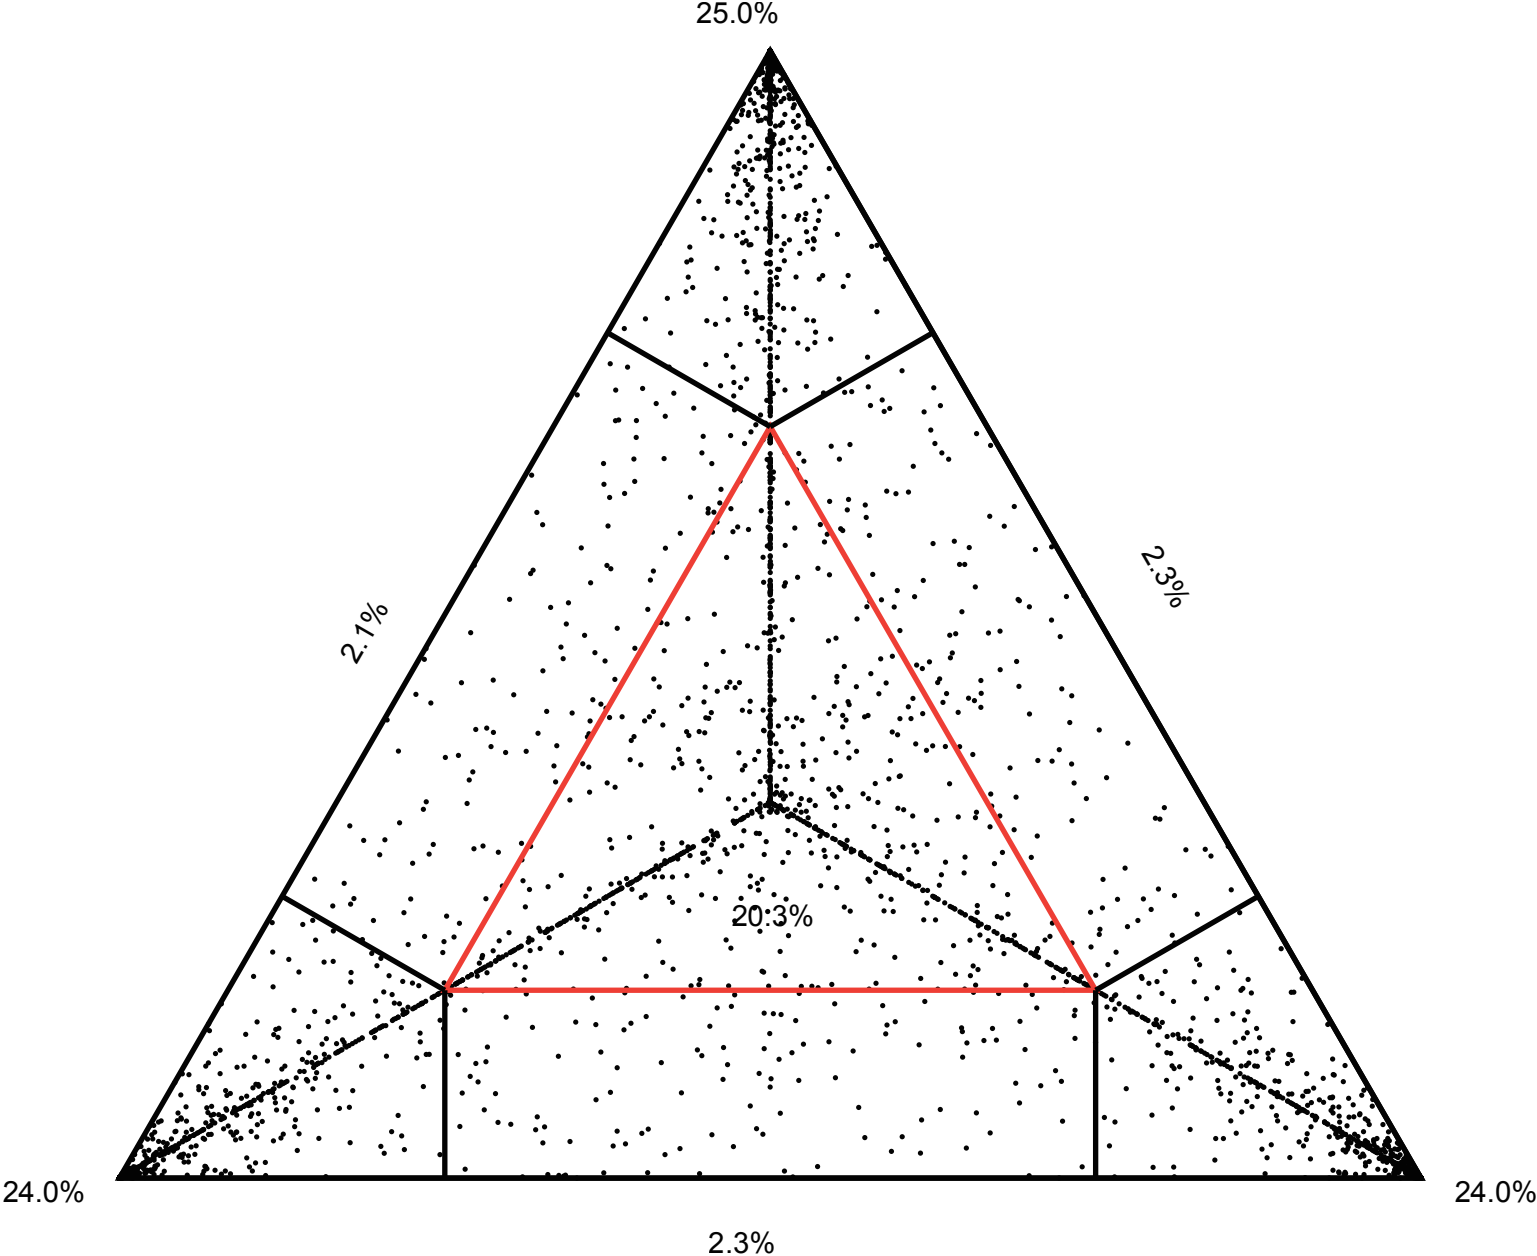

Supplement: s1 [file s1]

Figure S3

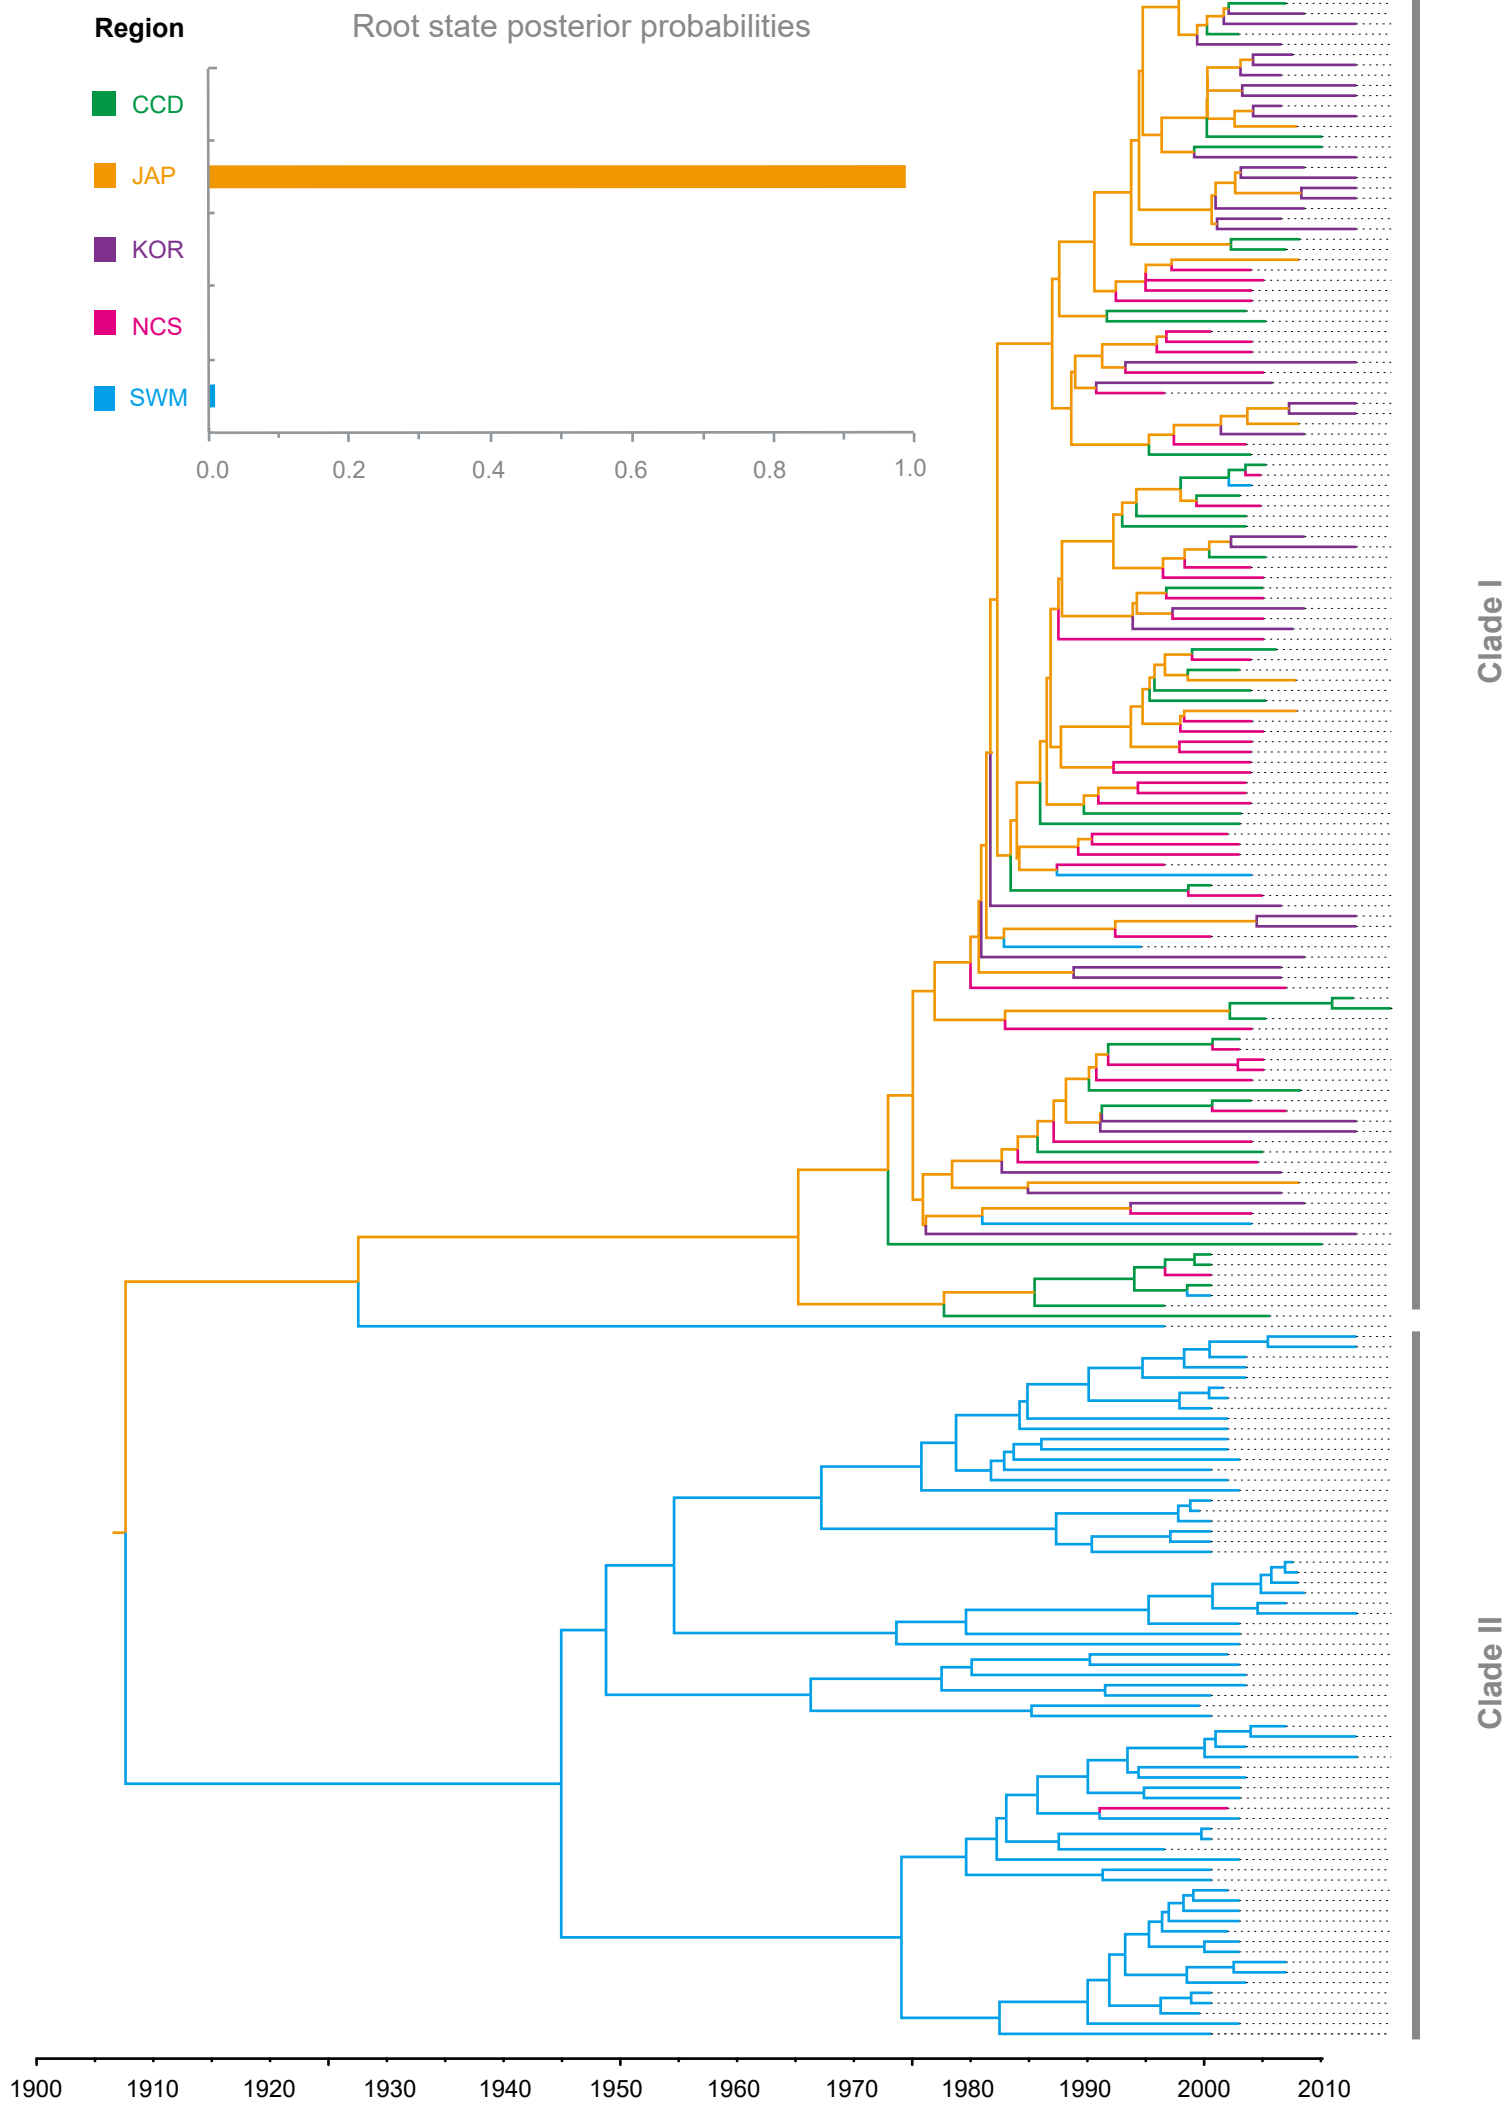

Supplement: s1 [file s1]
